# Supplementary material
Source: MDPI journal article supplement (https://www.mdpi.com/2072-4292/16/10/1677)
Supplement: s1 [file s1 › remotesensing-2970771-supplementary.pdf]

## Supplementary material

Table S1. Location of 29 AERONET stations in 10 European countries, the available number of daily AERONET measurements between 2010 and 2023, the percentage of retained collocations for both Terra and Aqua MODIS

| Country | Station            | Latitude | Longitude | Nr. AOD<br>AERONET | % Terra<br>MODIS | % Aqua<br>MODIS |
|---------|--------------------|----------|-----------|--------------------|------------------|-----------------|
| AU      | Kanzelhoe_Obs      | 46.677   | 13.901    | 842                | 48.61            | 33.05           |
| AU      | Vienna_BOKU        | 48.237   | 16.331    | 957                | 60.47            | 48.22           |
| AU      | Vienna_UNIVIE      | 48.221   | 16.355    | 493                | 60.76            | 46.71           |
| BG      | Galata_Platform    | 43.044   | 28.193    | 1976               | 37.20            | 29.95           |
| BG      | Sofia_IEBAS        | 42.653   | 23.386    | 462                | 60.76            | 59.31           |
| BY      | Minsk              | 53.920   | 27.601    | 1435               | 59.41            | 59.72           |
| EE      | Toravere           | 58.264   | 26.466    | 1723               | 61.26            | 60.27           |
| LT      | Irbe_lighthouse    | 57.750   | 21.722    | 365                | 64.28            | 52.13           |
| MD      | Moldova            | 47.000   | 28.815    | 1465               | 61.92            | 67.40           |
| PL      | Belsk              | 51.836   | 20.791    | 1292               | 27.55            | 22.33           |
| PL      | Debrzyna_PULS      | 53.782   | 16.592    | 207                | 45.04            | 35.30           |
| PL      | POLWET_Rzecin      | 52.762   | 16.309    | 181                | 42.91            | 28.74           |
| PL      | Raciborz           | 50.083   | 18.191    | 1032               | 35.00            | 28.33           |
| PL      | Strzyzow           | 49.878   | 21.861    | 1061               | 56.91            | 45.53           |
| PL      | Warsaw UW          | 52.210   | 20.982    | 593                | 62.12            | 45.45           |
| RO      | Bucharest_Inoe     | 44.348   | 26.028    | 759                | 35.96            | 27.53           |
| RO      | CLUJ_UBB           | 46.768   | 23.551    | 1231               | 57.82            | 44.78           |
| RO      | Eforie             | 44.075   | 28.632    | 1106               | 43.65            | 37.02           |
| RO      | Gloria             | 44.599   | 29.359    | 1719               | 31.74            | 24.47           |
| RO      | Iasi_Loasl         | 47.193   | 27.555    | 1408               | 38.37            | 32.75           |
| RO      | Magurele_Inoe      | 44.348   | 26.030    | 1643               | 58.39            | 60.97           |
| RO      | Section-7_Platform | 44.545   | 29.446    | 620                | 63.73            | 57.21           |
| RO      | Timisoara          | 45.746   | 21.227    | 970                | 52.38            | 40.48           |
| SK      | Poprad-Ganovce     | 49.035   | 20.322    | 1279               | 49.58            | 42.13           |
| UA      | Kyiv               | 50.363   | 30.496    | 1674               | 67.01            | 53.92           |
| UA      | Kyiv_AO            | 50.452   | 30.498    | 247                | 36.91            | 30.59           |
| UA      | Lugansk            | 48.570   | 39.364    | 60                 | 46.39            | 39.81           |
| UA      | Martova            | 49.936   | 36.953    | 66                 | 54.36            | 47.67           |
| UA      | Sevastopol         | 44.615   | 33.517    | 659                | 48.90            | 35.58           |

1. MODIS Terra and Aqua AOD difference across CEE, during the four seasons between 2010 and 2023.

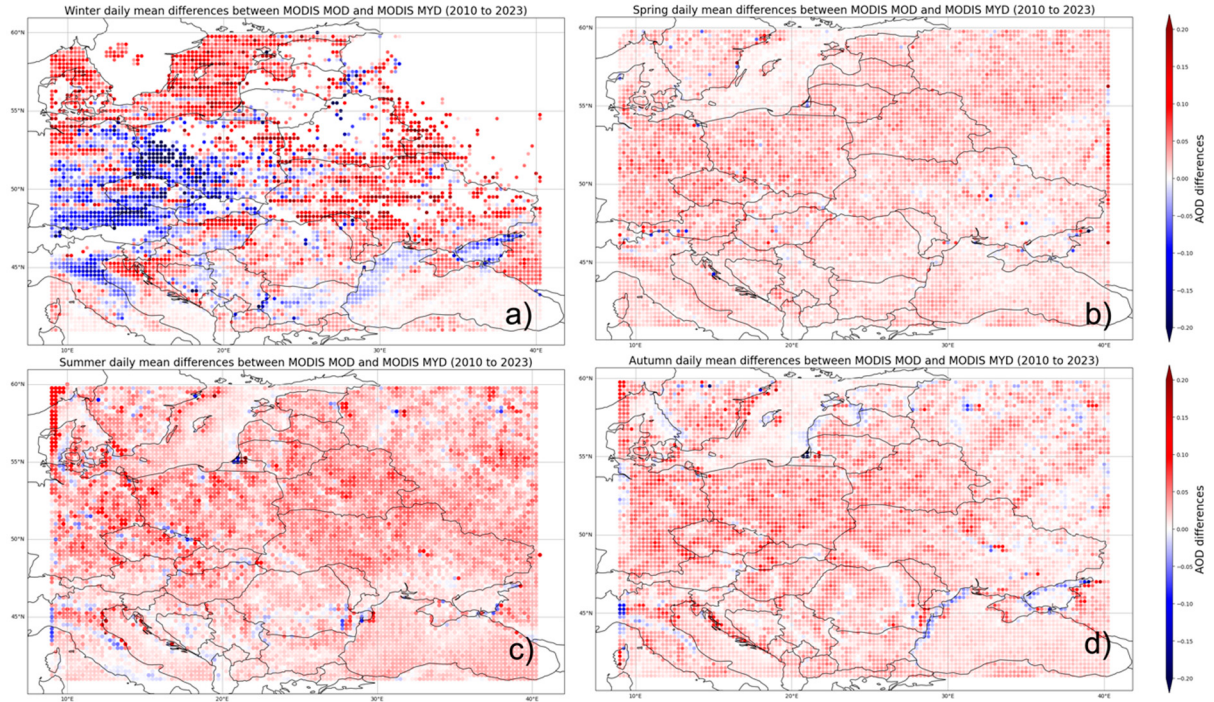

Figure S1. Spatial distribution of Aerosol Optical Depth (AOD) averaged difference from MODIS Terra and Aqua (MOD AOD – MYD AOD) over Central-East Europe for four seasons: (a) winter, (b) spring, (c) summer, and (d) autumn, between 2010 and 2023. The color bars indicate AOD difference values, with the cutoff at 0.2.

We analyzed the differences between MODIS Terra and Aqua for the 4 seasons, for the period 2010–2023, in the following plots. Figure S1 presents the spatial distribution of the difference of MODIS MOD AOD – MODIS MYD AOD. We notice the largest variability and AOD difference in winter followed by summer, autumn and lastly in spring the AOD differences are the smallest. In winter the number of measurements is low and the AOD values are small compared to other seasons, leading to larger biases and uncertainties in AOD retrievals for both instruments. In regions where the difference is negative, MODIS Terra (MOD) mean AOD is significantly lower than the AOD retrieved from Aqua, but also the number of retrievals is lower in Aqua (which influences the mean across season). In other seasons we observe discrepancies mainly on the coast and inland larger bodies of water (lakes, rivers), where the sediment masking leads to larger uncertainties.

## 2. Ångström exponent comparison and discussions

Figure S2 depicts a comparative analysis between the Ångström exponent products of MODIS Terra (a) and MODIS Aqua (b) at 440/675 nm and the corresponding AERONET AE values derived at 440/675 nm. The marginal histograms represent the data distribution in bins of 0.25, with the colour mapping indicating collocated MODIS AOD at 550 nm. Notably, while AERONET AE displays a reversed lognormal distribution, peaking at 1.5, the distribution of MODIS (both Terra and Aqua) does not conform to any established distribution due to the model-set nature of the AE values in look-up tables. It is observed in both cases that an AE of 1.5 corresponds to an AOD lower than 0.1, revealing a limitation in the MODIS algorithm. The MODIS AE parameter is obtained as a “derived” rather than a “retrieved” product of the retrieval algorithm and is typically considered unreliable in low AOD conditions,  $< 0.2$  [48]. The Dark Target algorithm is known to have a poor performance when mixing fine and coarse aerosol models over land, resulting in clustered AE values [62,63]. Consequently, correlations between the MODIS AE and AERONET AE are suboptimal especially at transition points between fine and coarse mode, as evident by the clustering of AE at 1.5 in Figure 5. Hence, discussion

across seasons is deemed redundant, as it would not reveal correlations between MODIS and AERONET AE or elucidate relationships between AOD and AE, given the influence of MODIS's AE modes.

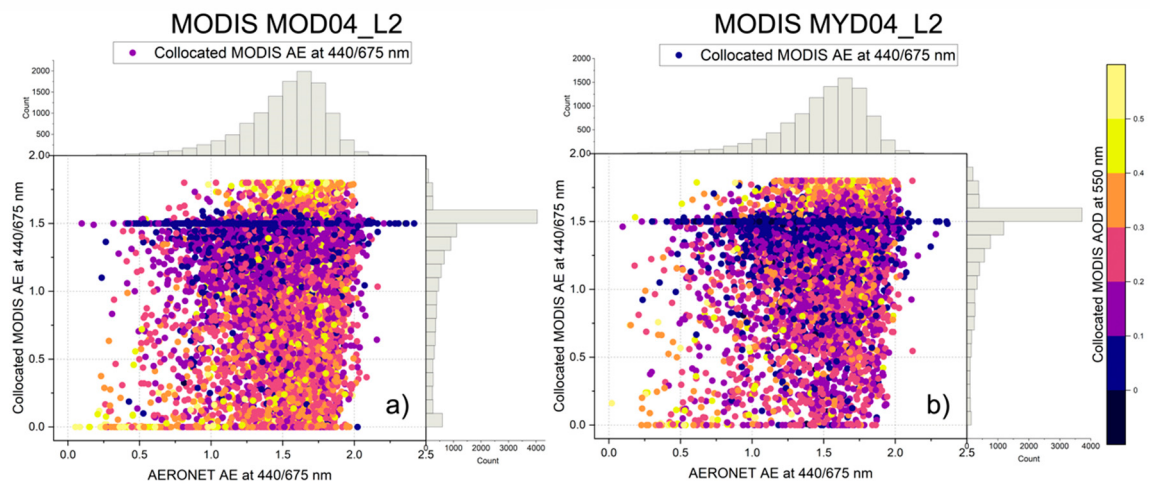

Figure S2. Central-East Europe comparative analysis between MODIS Terra (a) and MODIS Aqua (b) Ångström exponent product at 440/675 nm and AERONET AE calculated at 440/675 nm, for the period 2010-2023. The marginal histograms display data distribution for 0.25 bins, while the color mapping corresponds to collocated MODIS AOD at 550 nm.

3. Annual AERONET AOD trend – complementary visual representation in support for Section 3.3

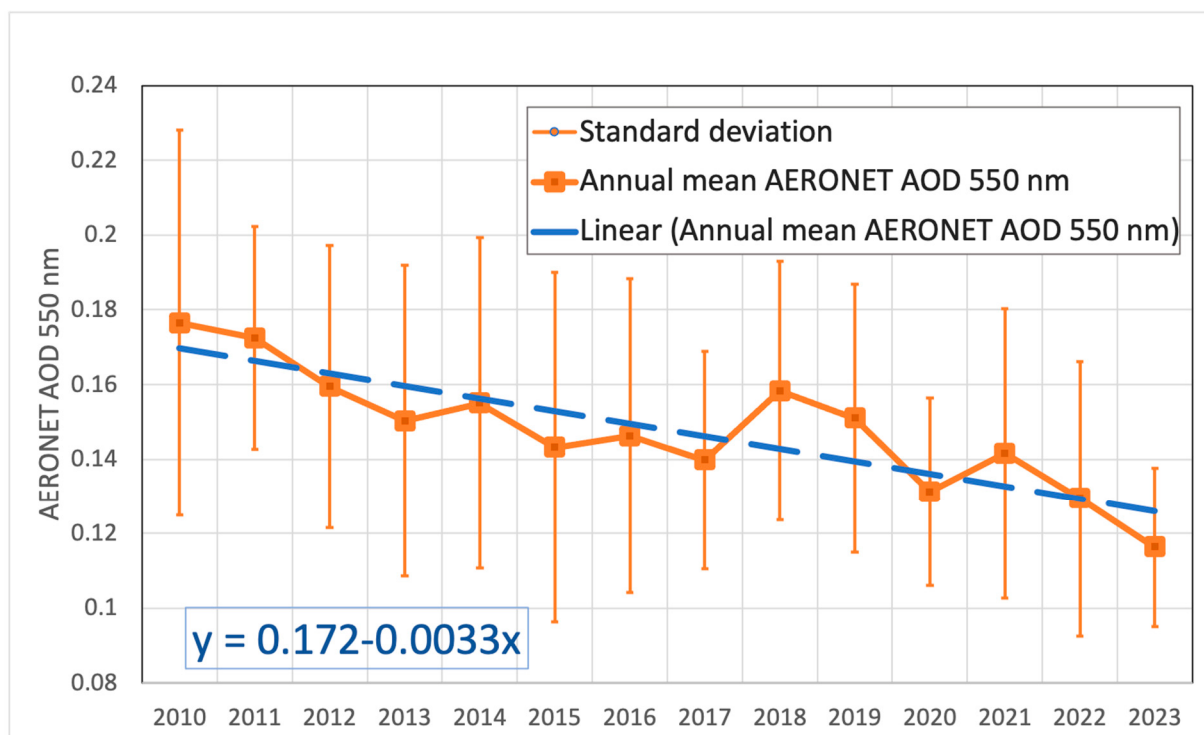

Figure S3. Annual mean AOD at 550 nm (orange line) and its trend (dotted blue line) are depicted in the subplot. Linear equation is shown.

#### 4. MODIS Aqua AE biases for different types of aerosols

Table S2. Descriptive statistics for the differences between AERONET AE and MODIS AE. Values presented for the following aerosol classes: biomass burning, continental, dust, marine, mixed, and polluted.

| AERONET AE - MODIS Aqua AE | N total | Mean   | Standard Deviation | Lower 95% CI | Upper 95% CI |
|----------------------------|---------|--------|--------------------|--------------|--------------|
| Biomass burning            | 629     | 0.328  | 0.420              | 0.295        | 0.361        |
| Continental                | 1927    | 0.149  | 0.240              | 0.139        | 0.160        |
| Dust                       | 940     | -0.157 | 0.481              | -0.188       | -0.126       |
| Marine                     | 694     | -0.266 | 0.268              | -0.286       | -0.246       |
| Mixed                      | 3408    | 0.216  | 0.421              | 0.202        | 0.230        |
| Polluted                   | 1987    | 0.468  | 0.389              | 0.451        | 0.485        |

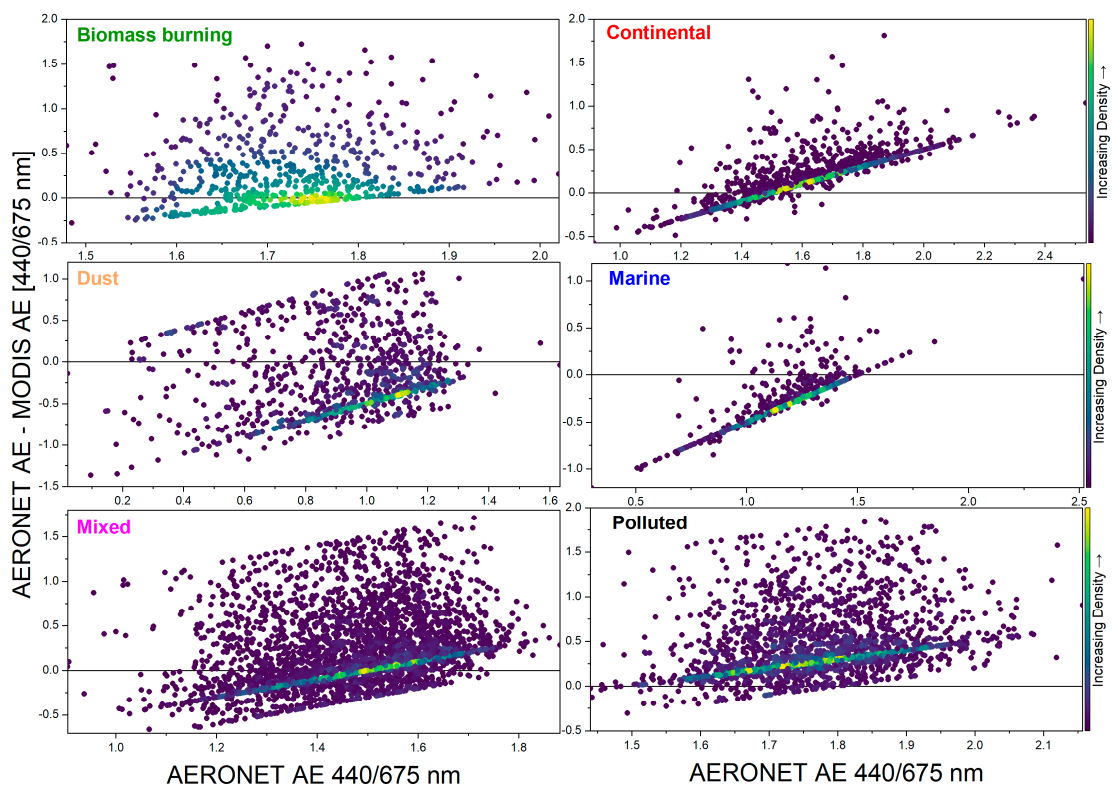

Figure S4. Ångström Exponent biases between AERONET and MODIS Aqua retrievals, for 6 aerosol types: biomass burning, continental, dust, marine, mixed and polluted. The color bar shows the points density. Descriptive statistics for these categories is presented in Table S2.
